# Supplementary material
Source: PubMed Central journal article supplement (PMC2666030)

Fig. S1

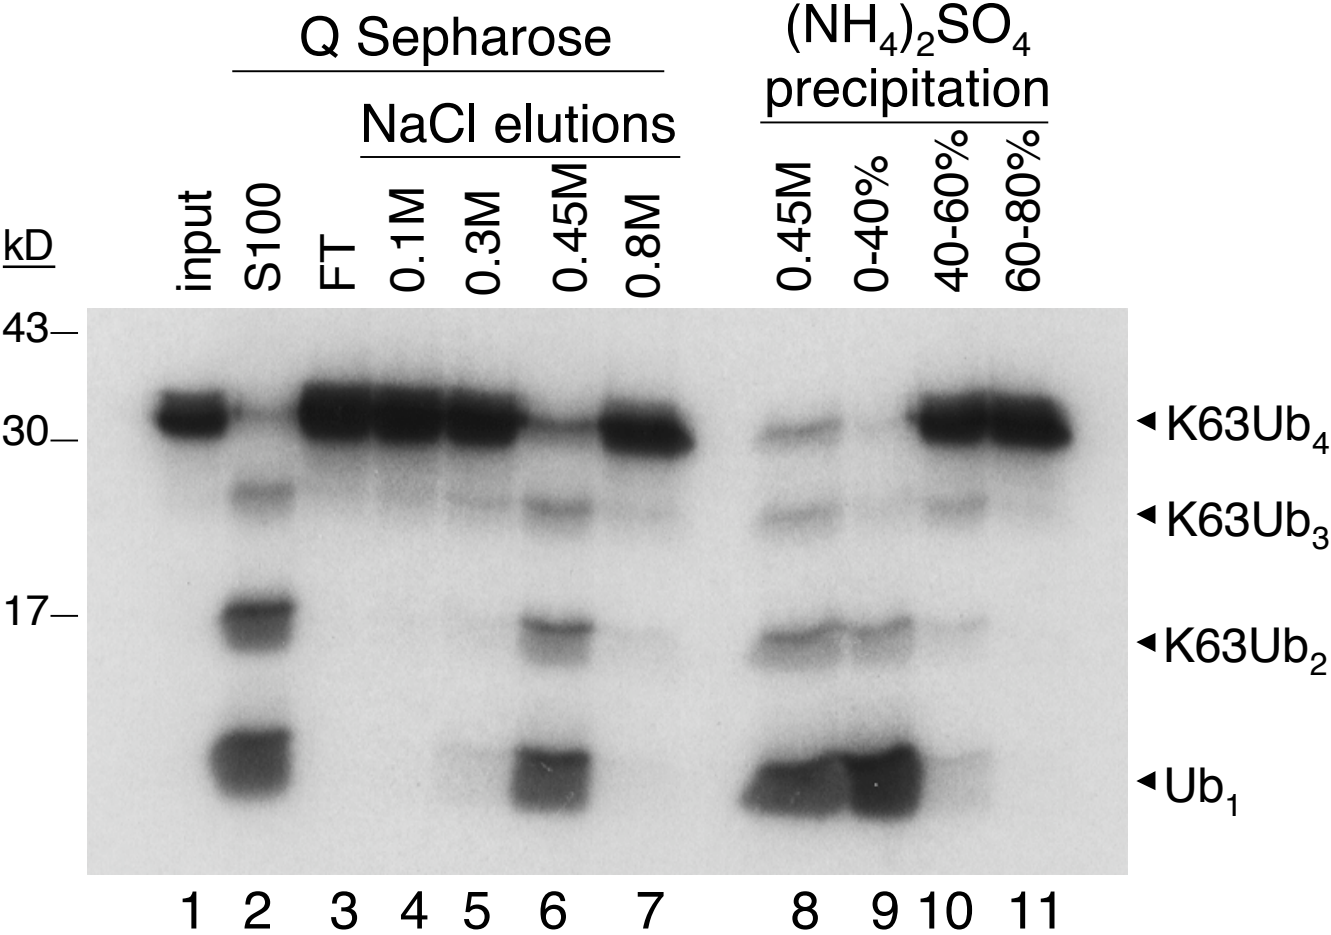

Fig. S2.

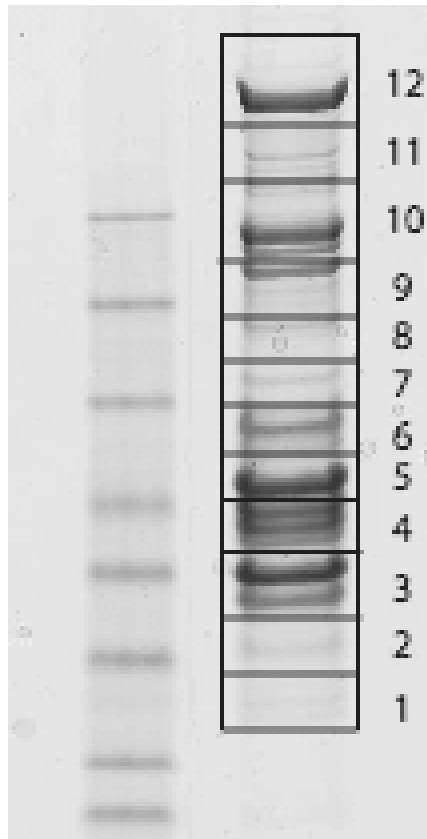

| Protein                                                          | # peptides | Gel slice | Mass   |
|------------------------------------------------------------------|------------|-----------|--------|
| <b>Proteasome</b>                                                |            |           |        |
| proteasomal ATPase-associated factor 1                           | 2          | 4         | 43132  |
| proteasome 26S ATPase subunit 1                                  | 2          | 7         | 49325  |
| proteasome 26S ATPase subunit 2                                  | 9          | 6         | 49002  |
| proteasome 26S ATPase subunit 3                                  | 5          | 6         | 49458  |
| proteasome 26S ATPase subunit 4                                  | 1          | 6         | 47451  |
| proteasome 26S ATPase subunit 5                                  | 6          | 6         | 45768  |
| proteasome 26S non-ATPase subunit 1                              | 11         | 9         | 106795 |
| proteasome 26S non-ATPase subunit 2                              | 8          | 10        | 100877 |
| proteasome 26S non-ATPase subunit 3                              | 13         | 8         | 61054  |
| proteasome 26S non-ATPase subunit 5                              | 6          | 6         | 56560  |
| proteasome (prosome, macropain) 26S subunit, non-ATPase, 6       | 3          | 7         | 45787  |
| proteasome 26S non-ATPase subunit 7                              | 5          | 7         | 37060  |
| proteasome 26S non-ATPase subunit 10                             | 1          | 1         | 24697  |
| proteasome 26S non-ATPase subunit 11                             | 3          | 5         | 47719  |
| proteasome 26S non-ATPase subunit 12                             | 7          | 8         | 53270  |
| 26 proteasome-associated pad1 homolog                            | N/A        | 3         | 34446  |
| HECT, UBA and WWE domain containing 1                            | 6          | 11        | 294370 |
| ubiquitin specific protease 9, Y-linked                          | 28         | 12        | 292851 |
| proteasome alpha 7 subunit                                       | 2          | 2         | 28041  |
| <b>COP9 signalosome</b>                                          |            |           |        |
| Damage-specific DNA binding protein 1                            | 1          | 10        | 128162 |
| COP9 constitutive photomorphogenic homolog subunit 2             | 4          | 6         | 51849  |
| COP9 constitutive photomorphogenic homolog subunit 3             | 20         | 5         | 48412  |
| COP9 signalosome subunit 4                                       | 14         | 5         | 46525  |
| COP9 signalosome subunit 5                                       | 9          | 4         | 37783  |
| COP9 signalosome subunit 6                                       | 5          | 4         | 36482  |
| COP9 complex subunit 7a                                          | 5          | 2         | 30429  |
| COP9 constitutive photomorphogenic homolog subunit 7B            | 2          | 3         | 29889  |
| COP9 signalosome subunit 8                                       | 3          | 1         | 23268  |
| <b>BRISC</b>                                                     |            |           |        |
| BRCA1/BRCA2-containing complex, subunit 3 (Brcc36)               | 18         | 3         | 35941  |
| brain and reproductive organ-expressed (TNFRSF1A modulator, BRE) | 14         | 5         | 46844  |
| hypothetical protein LOC23172 (Abro1)                            | N/A        | 4         | 46770  |
| hypothetical protein LOC29086 (HSPC412)                          | 26         | 4         | 36429  |

Fig. S3

Uch37 is present in the PA700 complex

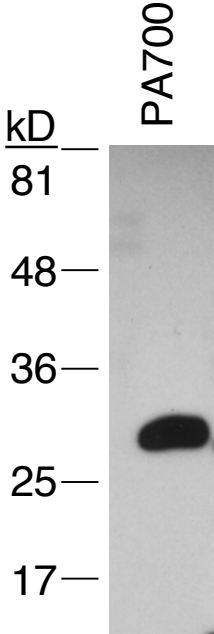

Fig. S4.

**A.** Brcc36-FLAG-HA  
BRISC complex

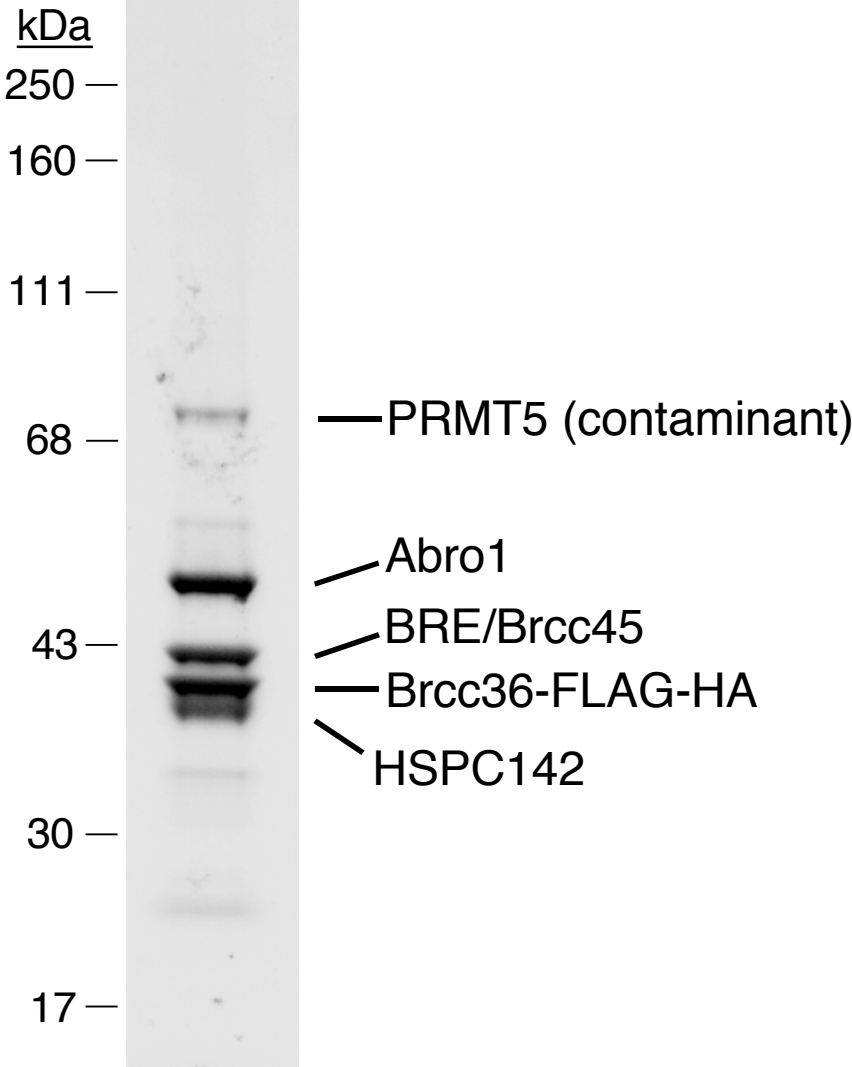

Fig. S5

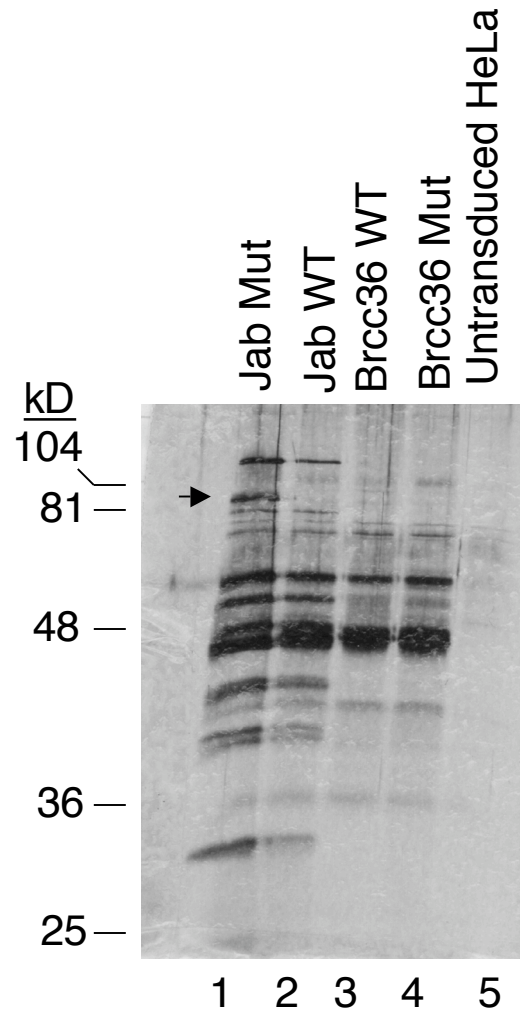

Fig. S6.

A.

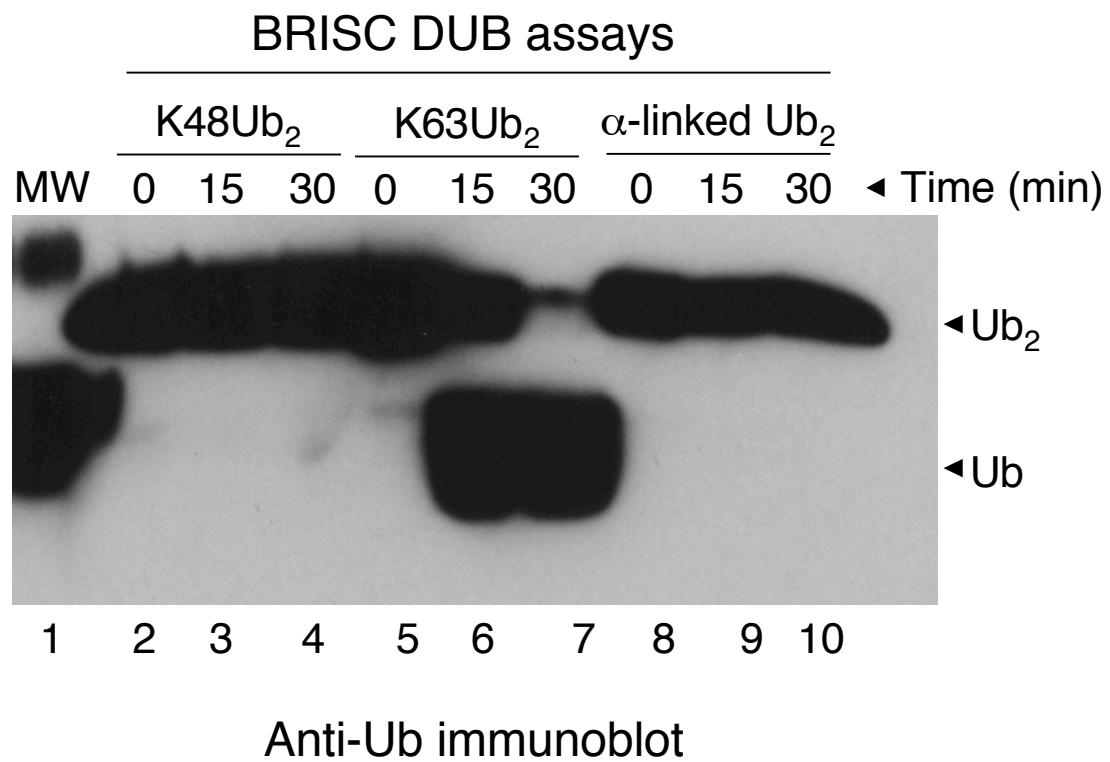

B.

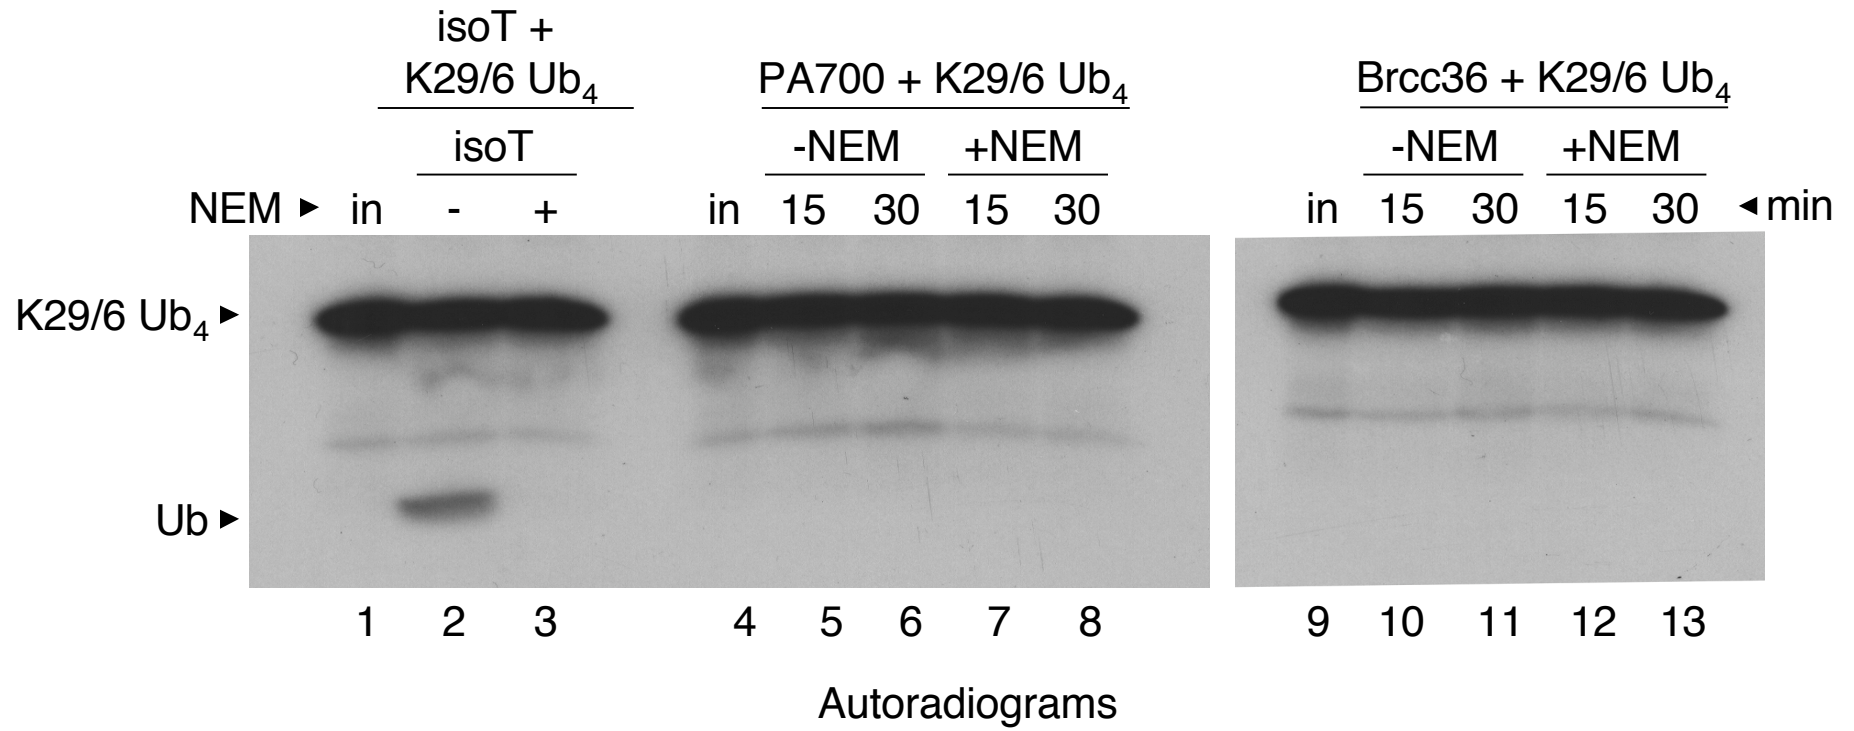

C.

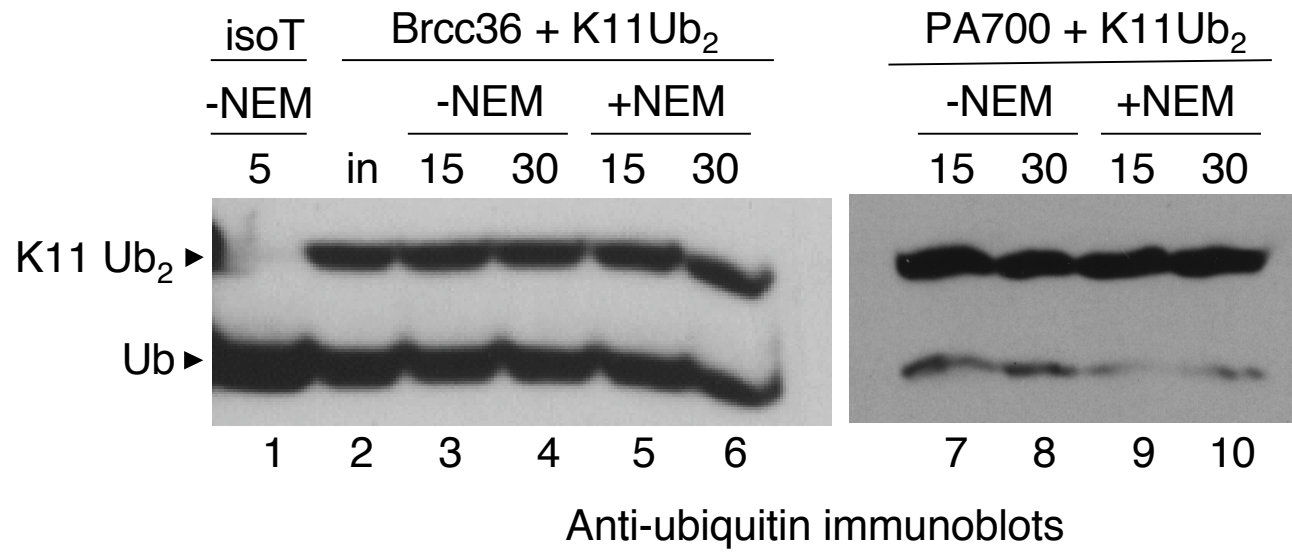



Fig. S7.

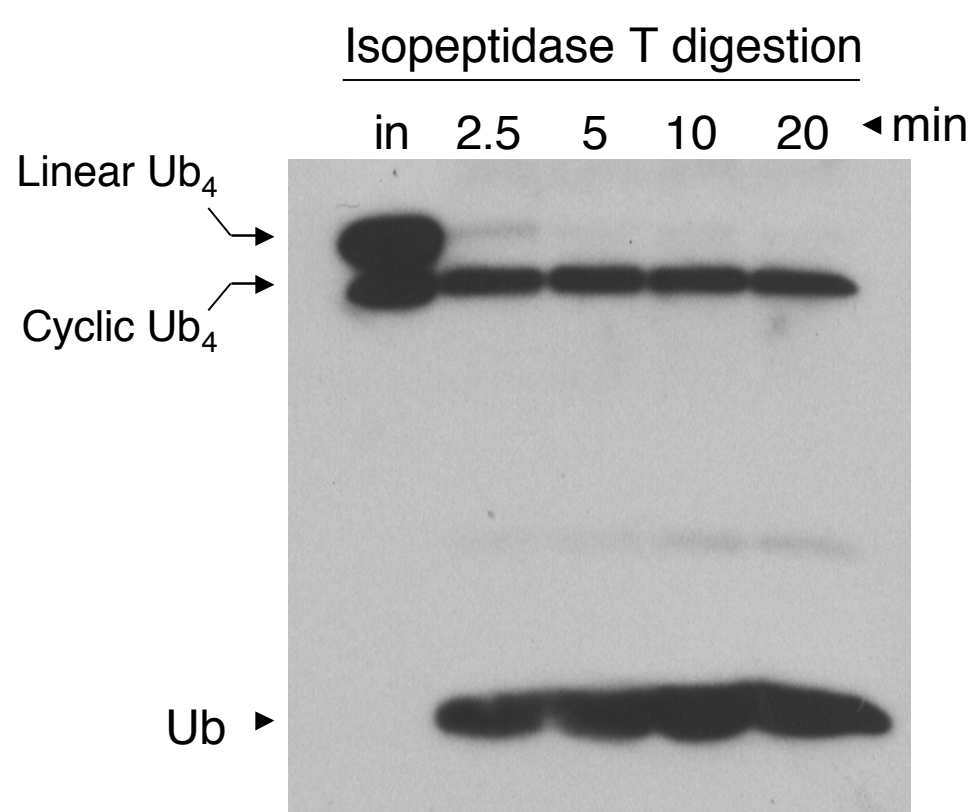

Cyclic Ub<sub>4</sub>

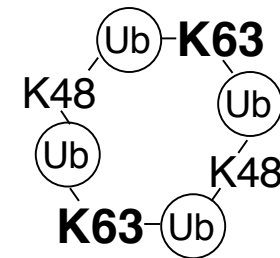

Linear Ub<sub>4</sub>

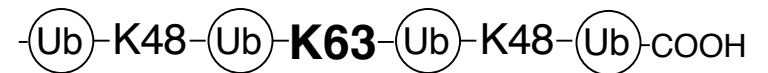

Fig. S8

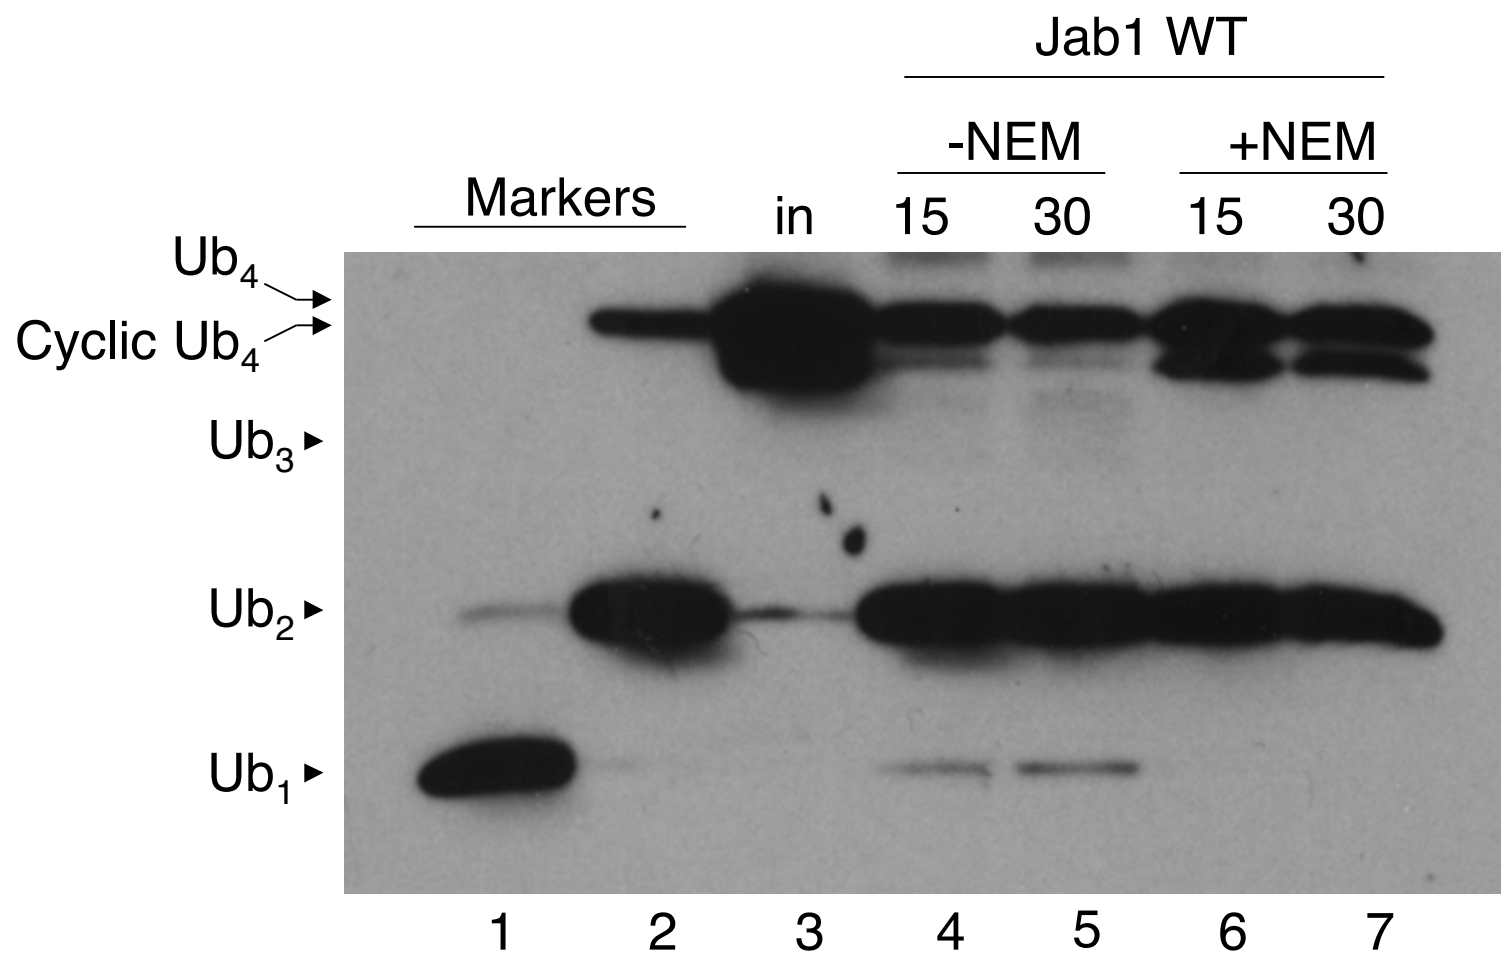

Fig. S9

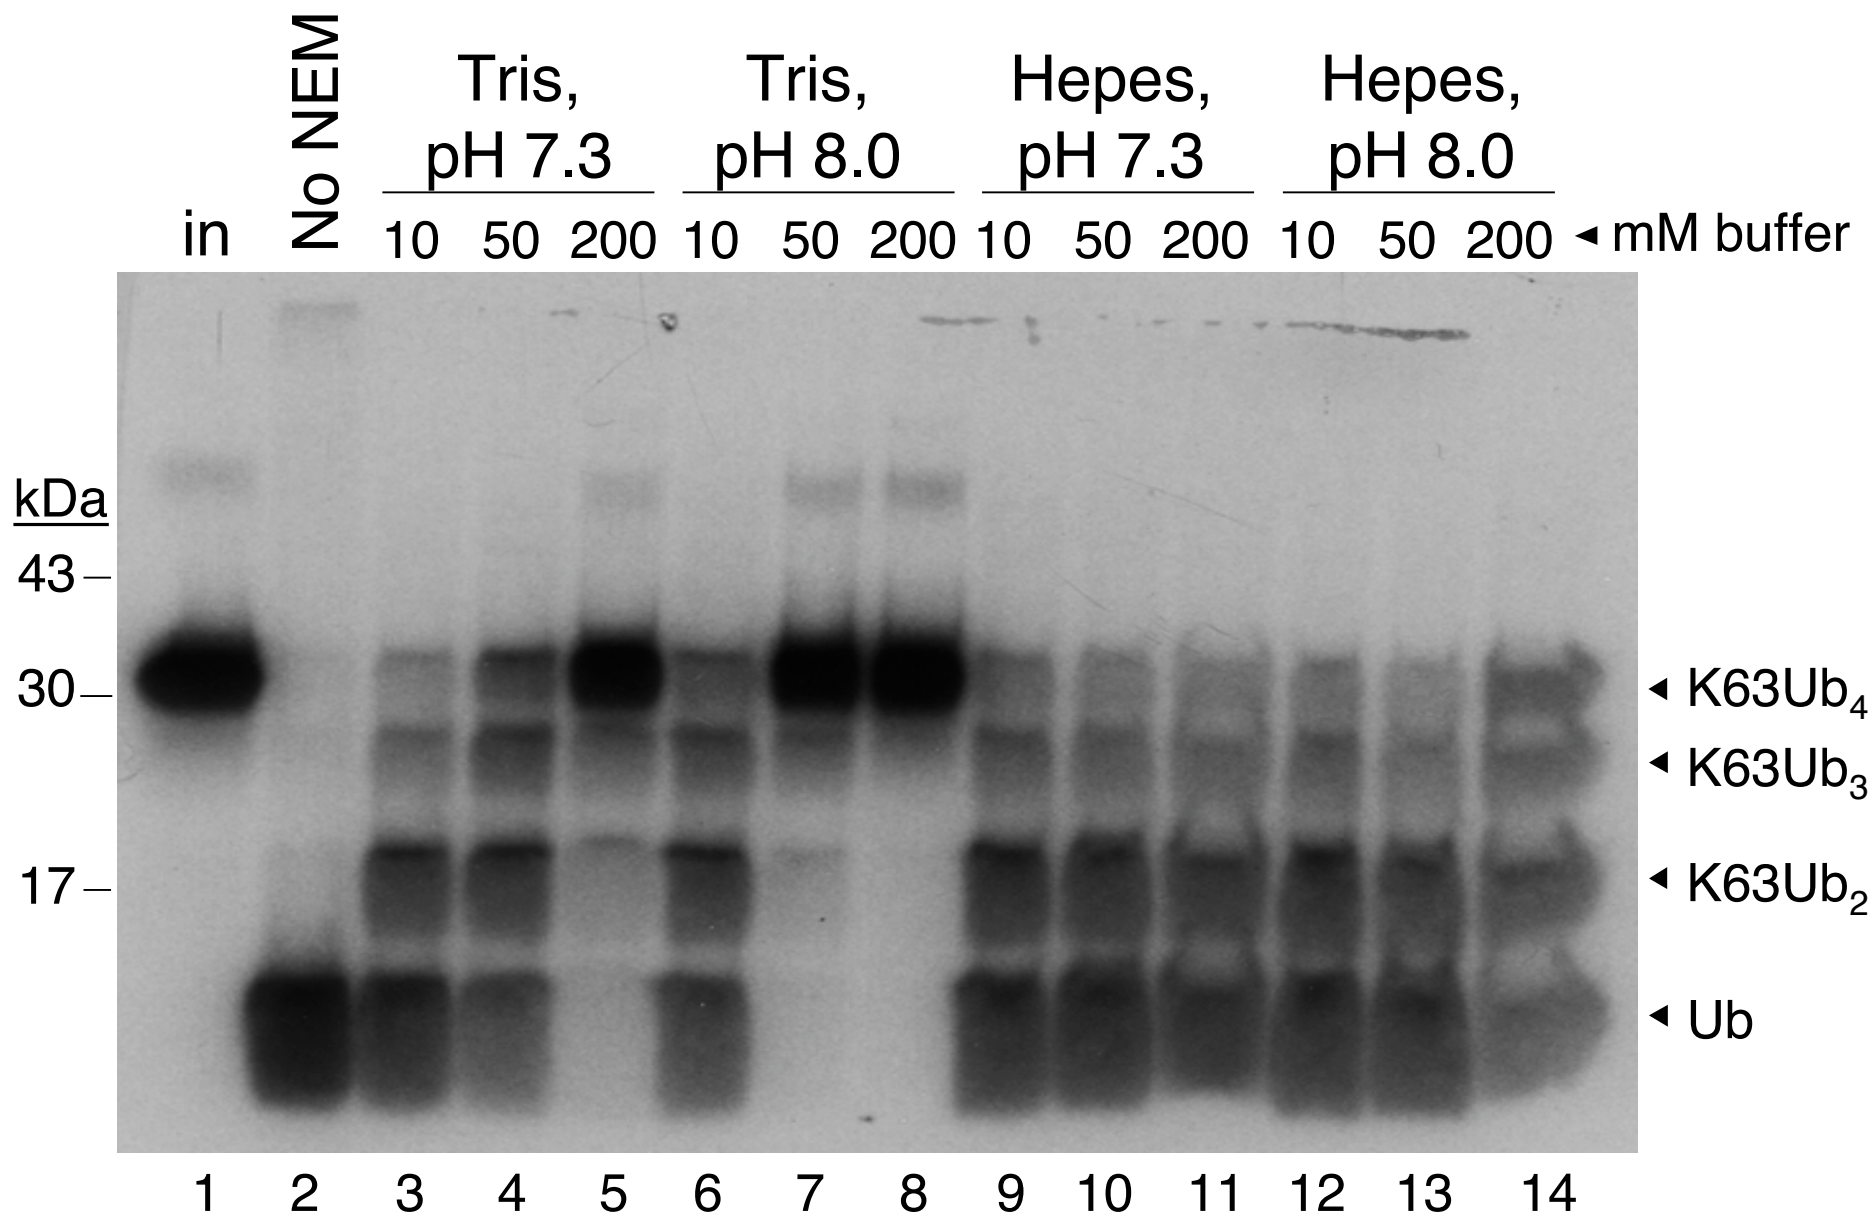

Fig. S10

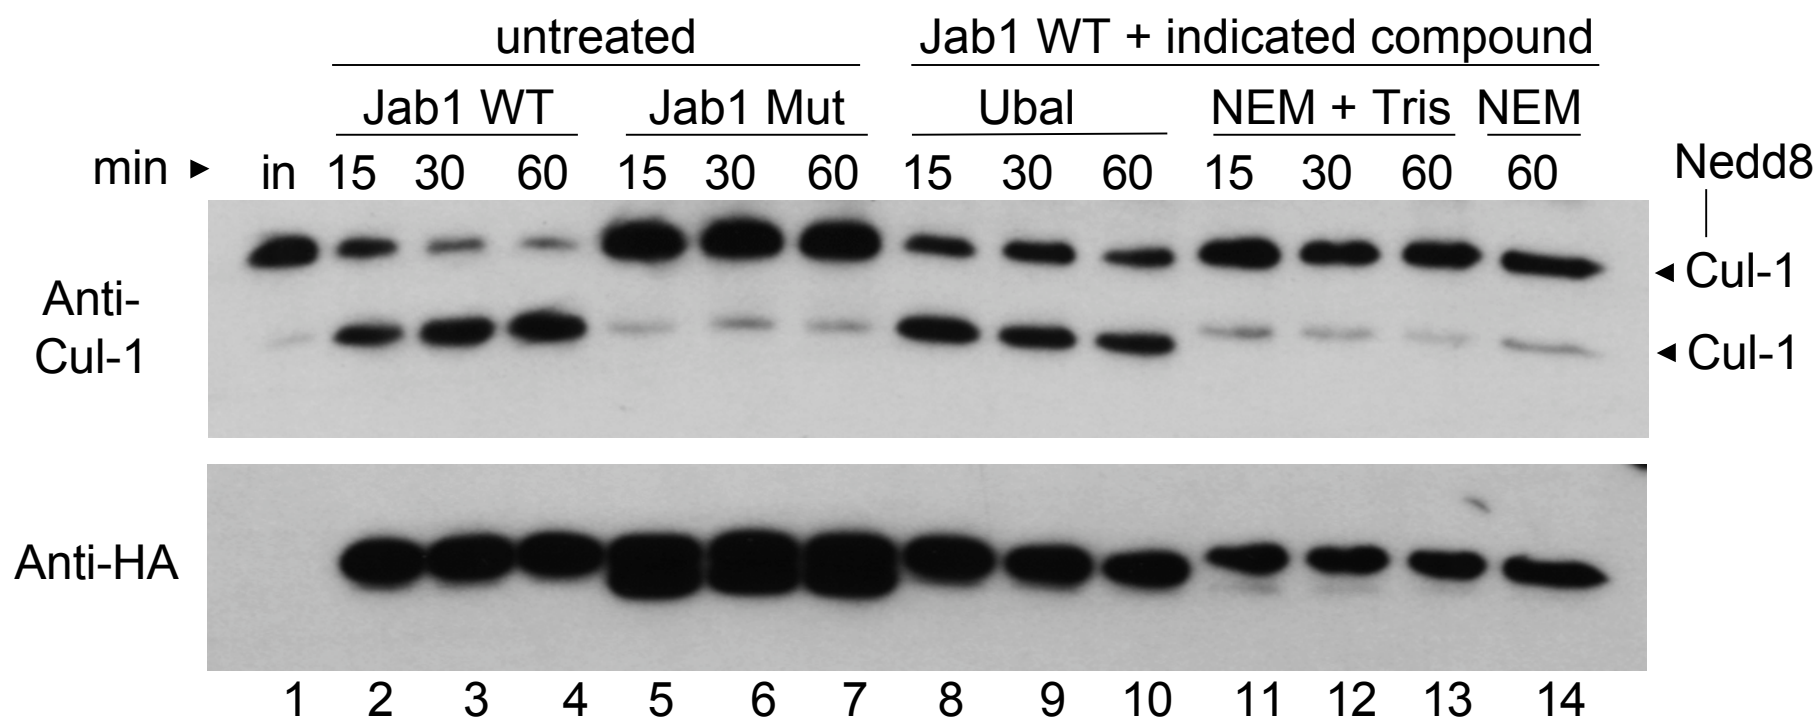

Fig. S11

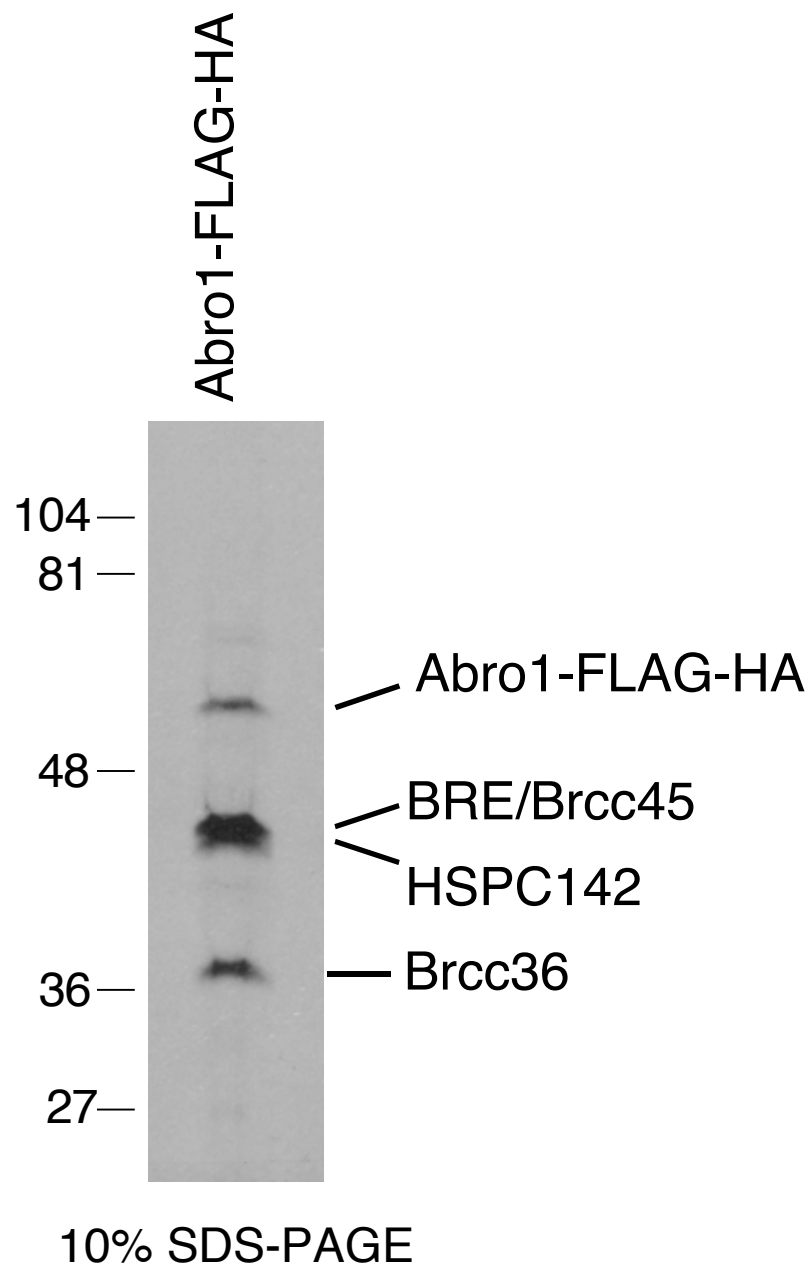

Fig. S12

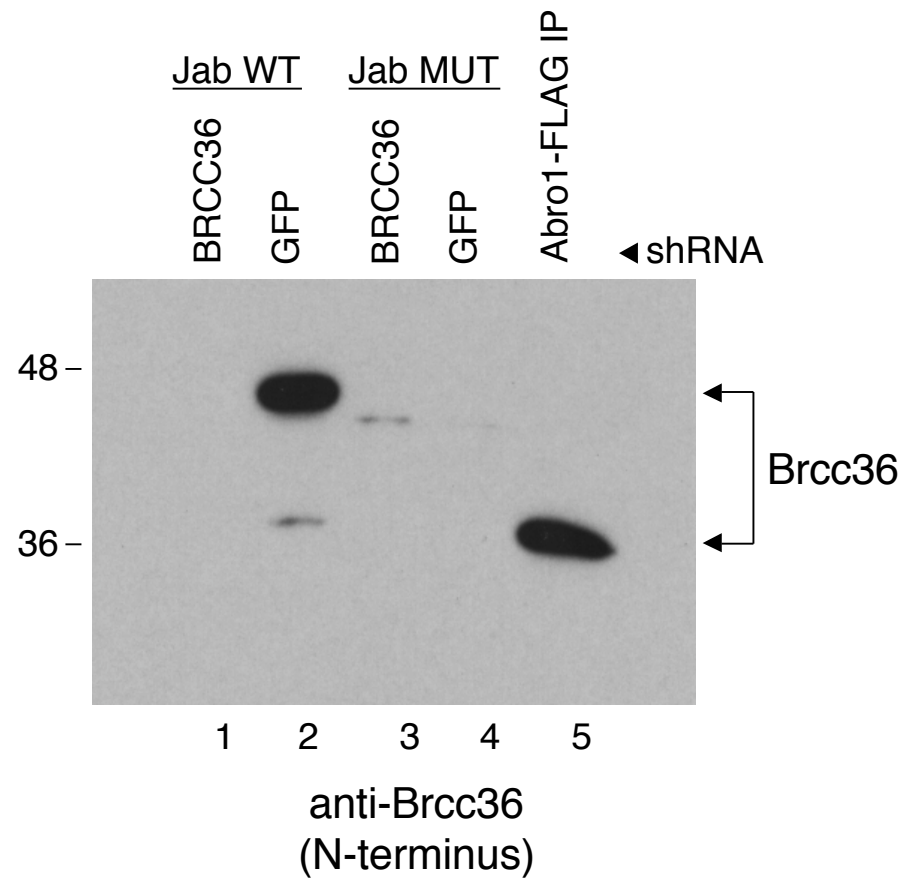

Fig. S13

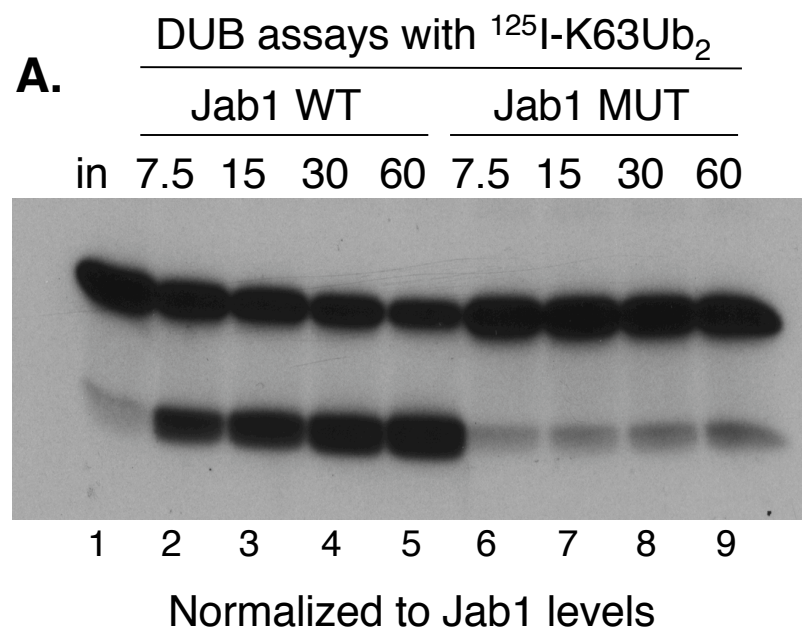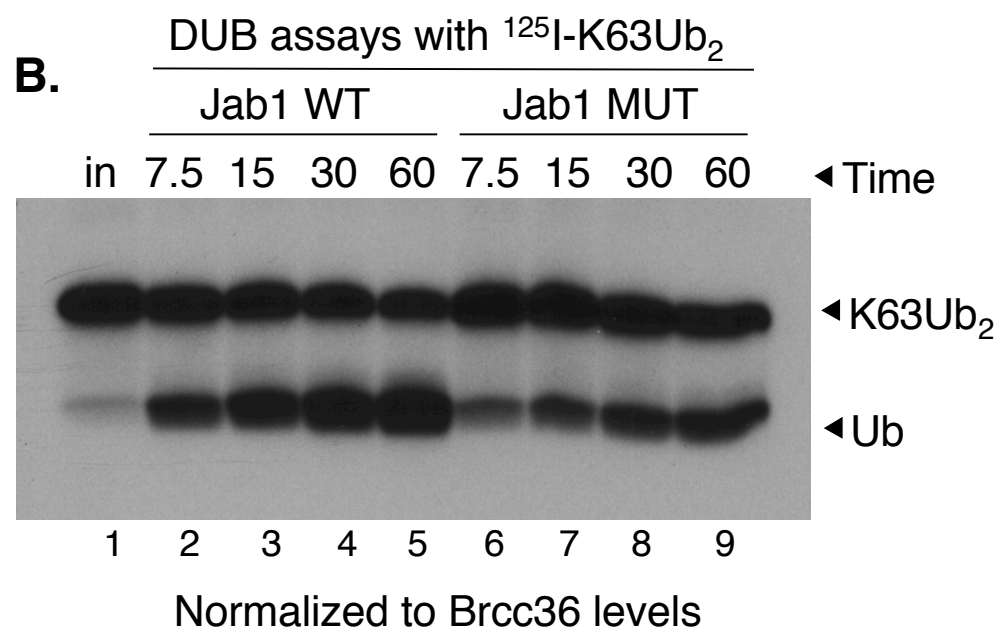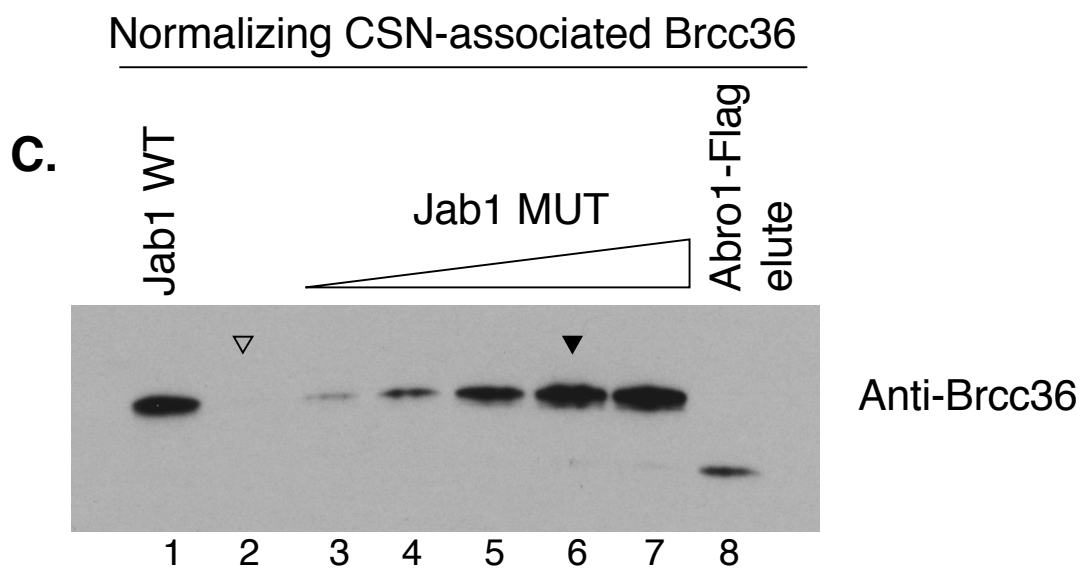

Fig. S14

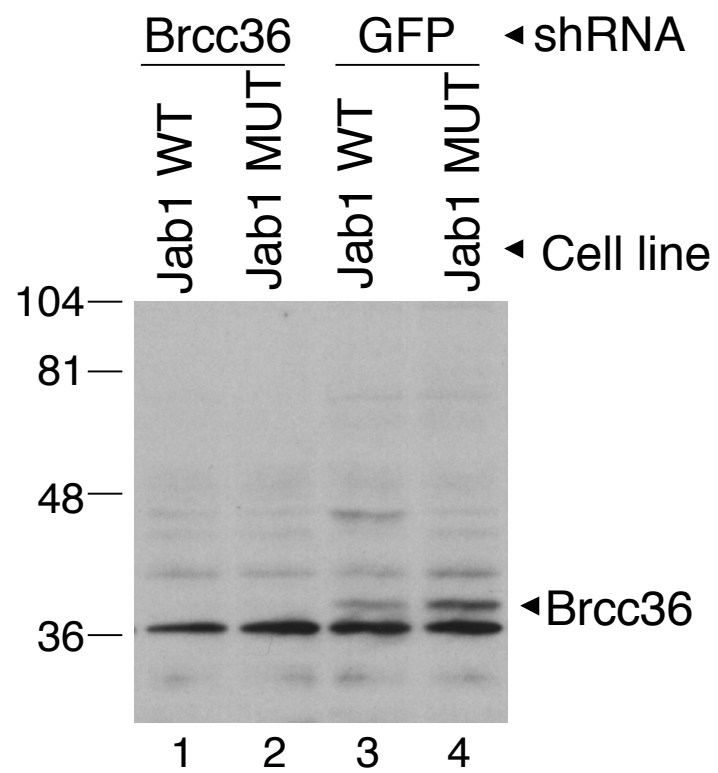



Fig. S15

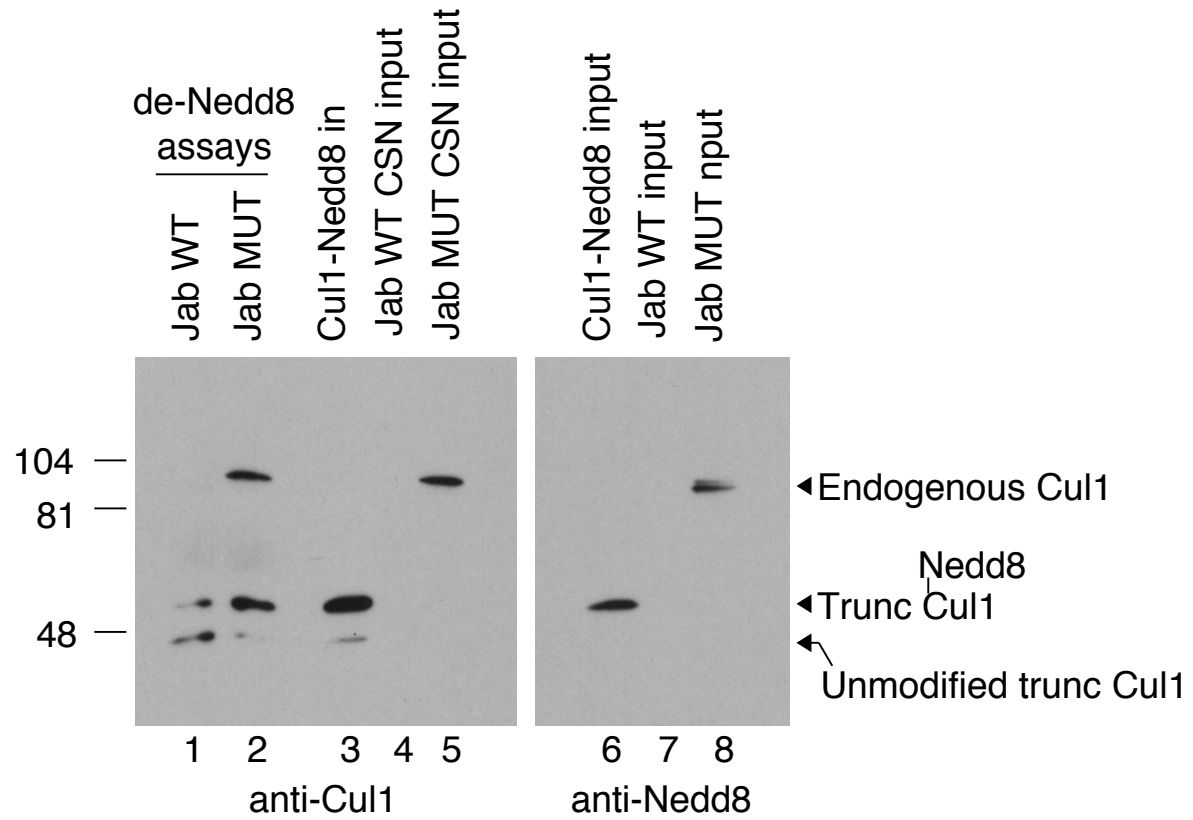

Fig. S16

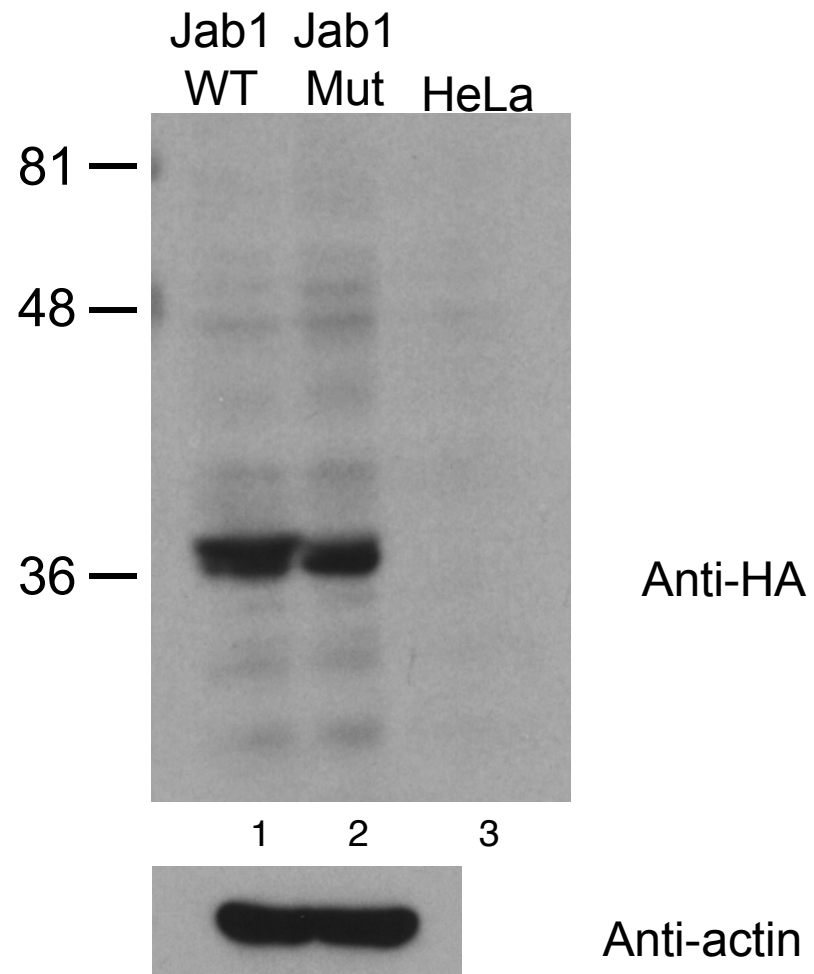

Supplement: emboj200927s1.pdf [file emboj200927s1.pdf]
